# Supplementary figures and images for: Area under the expiratory flow-volume curve: predicted values by regression and deep learning methods and recommendations for clinical practice
Source: HighWire-hosted journal article supplement (doi:10.1136/bmjresp-2021-000925), 2021-04-01

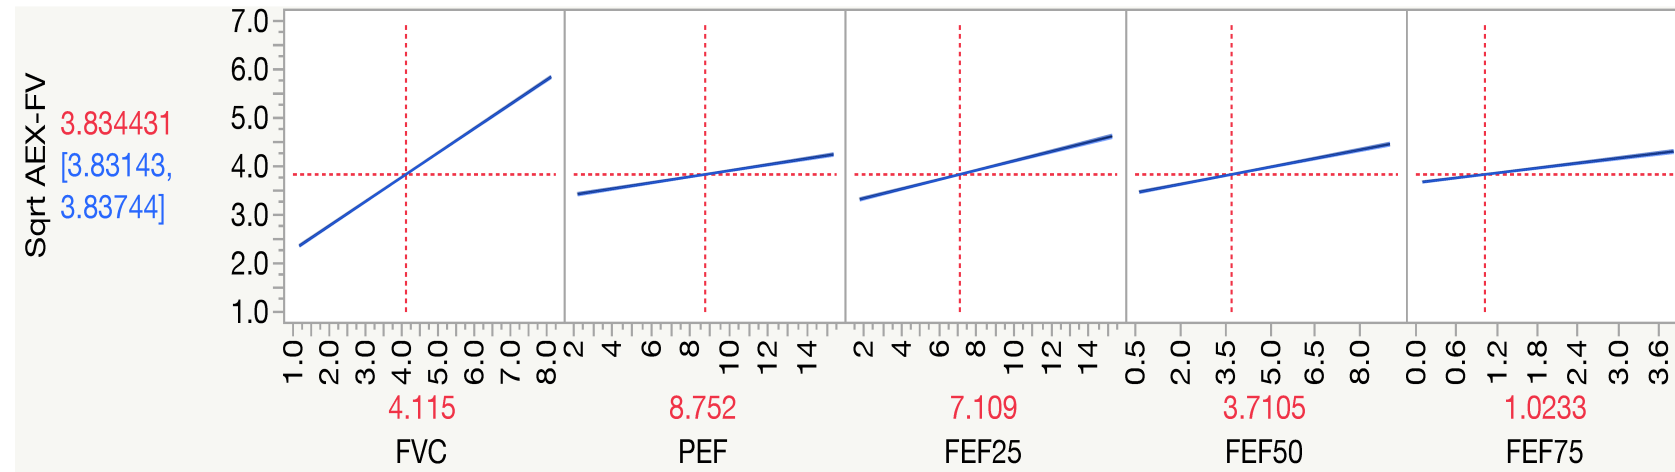

Supplemental Figure S1.

Supplement: bmjresp-2021-000925supp001_data_supplement.pdf [file bmjresp-2021-000925supp001_data_supplement.pdf]
